# Supplementary material
Source: ML conference proceedings conference paper supplement (https://proceedings.mlr.press/v216/andrade23a.html)
Supplement: Supplementary file 1 [file andrade23a-supp.pdf]

---

# Robust Gaussian Process Regression with the Trimmed Marginal Likelihood (Supplementary Material)

---

Daniel Andrade<sup>1</sup>

Akiko Takeda<sup>2,3</sup>

<sup>1</sup>Education and Research Center for Artificial Intelligence and Data Innovation, Hiroshima University, Hiroshima, Japan

<sup>2</sup>Department of Mathematical Informatics, The University of Tokyo, Tokyo, Japan

<sup>3</sup>Center for Advanced Intelligence Project, RIKEN, Tokyo, Japan

## A PROOFS

### A.1 CONVERGENCE GUARANTEE OF THE PROPOSED PROJECTED GRADIENT DESCENT METHOD

Optimization problem (P1) from the main paper is given by

$$\min_{\mathbf{b}} f(\mathbf{b}) \text{ s.t. } \|\mathbf{b}\|_0 = n - m. \quad (1)$$

This problem can be expressed as an unconstrained optimization problem by using the indicator function<sup>1</sup> as follows:

$$\min_{\mathbf{b}} F(\mathbf{b}), \quad (2)$$

with

$$F(\mathbf{b}) := f(\mathbf{b}) + \delta_C(\mathbf{b}), \text{ where } C = \{\mathbf{b} \in \mathbb{R}^n \mid \|\mathbf{b}\|_0 = n - m\}.$$

Recently, for analyzing the convergence rate of first-order methods for nonconvex objective functions, the so-called Kurdyka–Lojasiewicz (KL) property is often used. If the objective function of  $F(\mathbf{b})$  satisfies the KL property with an exponent of  $\alpha = 1/2$  and the sequence  $\{b_k\}$  generated by the proximal gradient algorithm is bounded, then it was proven that  $\{b_k\}$  converges locally and linearly to a stationary point of  $F$  (see, for example, Attouch et al. [2010, 2013], Li and Pong [2018]). Therefore, here, we only need to prove that  $F(\mathbf{b})$  is a KL function with exponent  $1/2$ .

The definition of KL functions encompasses broad classes of functions, and it is known that a proper closed semi-algebraic function is a KL function with a suitable exponent  $\alpha \in [0, 1)$ . The above function  $F$  is also a KL function.

**Theorem 1.** *Any sequence  $\{b_k\}$  generated by projected gradient algorithm for Problem (1) globally converges to a stationary point with locally linear convergence rate.*

*Proof.* First, we show global convergence. Bolte et al. [2014] implies that the objective function  $F$  of (2) is a proper lower semi-continuous KL function. Considering that  $F$  is lower bounded and  $\nabla f$  is Lipschitz continuous, we can confirm the global convergence of the proximal gradient method from [Attouch et al., 2013, Theorem 5.1 and Remark 5.2]. Now for proving the convergence rate, we will check the KL exponent of  $F$ .  $F$  can be further rewritten as

$$F(\mathbf{b}) = \min_{S \subseteq \{1, \dots, n\}, |S|=m} f(\mathbf{b}) + \delta_{\Omega_S}(\mathbf{b}),$$

where  $\Omega_S := \{\mathbf{b} \in \mathbb{R}^n \mid b_i = 0, \forall i \in S\}$ . Here, for all possible  $S$ ,  $\delta_{\Omega_S}(\mathbf{b})$  are proper closed polyhedral functions. Then [Li and Pong, 2018, Corollary 5.2] implies that  $F(\mathbf{b})$  is a KL function with an exponent of  $1/2$ . From this, and the boundedness of  $\{b_k\}$ , [Li and Pong, 2018, Proposition 5.1] implies that  $\{b_k\}$  achieves linear convergence locally.  $\square$

<sup>1</sup>The indicator function is defined as  $\delta_C(\mathbf{b}) := \begin{cases} 0 & \text{if } \mathbf{b} \in C, \\ \infty & \text{else.} \end{cases}$

## A.2 PROOF OF ASYMPTOTICALLY CORRECT OUTLIER REJECTION

Here we prove Proposition 1. Note that ignoring constants, we may write the negative marginal log-likelihood (NLL) as

$$\begin{aligned} \text{NLL}(\sigma^2, \eta, \mathbf{l}) &:= -2 \log p(\mathbf{y}|X, \sigma^2, \eta, \mathbf{l}) - n \log 2\pi \\ &= \mathbf{y}^T (K_{\eta, \mathbf{l}} + \sigma^2 I)^{-1} \mathbf{y} + \log |K_{\eta, \mathbf{l}} + \sigma^2 I| \\ &= \frac{1}{\eta} \mathbf{y}^T (K + \frac{\sigma^2}{\eta} I)^{-1} \mathbf{y} + \log(\eta^n |K + \frac{\sigma^2}{\eta} I|), \end{aligned}$$

where  $K := K_{1, \mathbf{l}}$  (that means  $K$  is  $K_{\eta, \mathbf{l}}$ , with  $\eta$  being set to 1).

First, we establish a lower bound on NLL. Let  $\lambda_0$  denote the smallest possible eigenvalue of  $K_{1, \mathbf{l}}$ , i.e.

$$\lambda_0 := \min_{\mathbf{l} \in \mathbb{D}} \lambda_{\min}(K_{1, \mathbf{l}}),$$

where  $\lambda_{\min}(A)$  denotes the smallest eigenvalue of a matrix  $A$ . Note that  $1 \geq \lambda_0 > 0$ . Analogously, let  $\lambda_1$  denote the largest possible eigenvalue of  $K_{1, \mathbf{l}}$ , i.e.

$$\lambda_1 := \min_{\mathbf{l} \in \mathbb{D}} \lambda_{\max}(K_{1, \mathbf{l}}),$$

where  $\lambda_{\max}(A)$  denotes the largest eigenvalue of a matrix  $A$ . Note that  $1 \leq \lambda_1 < n$ . Therefore, for any  $\mathbf{l} \in \mathbb{D}$ , all eigenvalues of  $K$  are bounded. In particular, we have

$$\lambda_{\min}\left(K + \frac{\sigma^2}{\eta}\right) \geq \lambda_0 + \frac{\sigma^2}{\eta},$$

and

$$\lambda_{\min}\left(\left(K + \frac{\sigma^2}{\eta}\right)^{-1}\right) \geq \left(\lambda_1 + \frac{\sigma^2}{\eta}\right)^{-1}.$$

Define

$$g_2(\sigma^2, \eta) := \frac{1}{\eta} \left(\lambda_1 + \frac{\sigma^2}{\eta}\right)^{-1} \|\mathbf{y}\|_2^2 + \log(\eta^n (\lambda_0 + \frac{\sigma^2}{\eta})^n),$$

then we have

$$g_2(\sigma^2, \eta) \leq \text{NLL}(\sigma^2, \eta, \mathbf{l}).$$

Since the function  $g_2$  is still slightly difficult to analyze, we establish another lower bounding function  $g_1$ .

First note that  $g_2$  can be written as follows

$$g_2(\sigma^2, \eta) = (\eta \lambda_1 + \sigma^2)^{-1} \|\mathbf{y}\|_2^2 + n \log(\eta \lambda_0 + \sigma^2).$$

Noting that

$$\begin{aligned} n \log(\lambda_0) + n \log(\eta + \sigma^2) &= n \log(\lambda_0 \eta + \lambda_0 \sigma^2) \\ &\leq n \log(\eta \lambda_0 + \sigma^2), \end{aligned}$$

and

$$\begin{aligned} \lambda_1^{-1} (\eta + \sigma^2)^{-1} &= (\lambda_1 \eta + \lambda_1 \sigma^2)^{-1} \\ &\leq (\lambda_1 \eta + \sigma^2)^{-1}, \end{aligned}$$

we have

$$g_1(\sigma^2, \eta) \leq g_2(\sigma^2, \eta),$$

where we defined

$$g_1(\sigma^2, \eta) := \lambda_1^{-1}(\eta + \sigma^2)^{-1} \|\mathbf{y}\|_2^2 + n \log(\lambda_0) + n \log(\eta + \sigma^2).$$

Therefore, we have

$$\min_{\sigma^2, \eta} g_1(\sigma^2, \eta) \leq \min_{\sigma^2, \eta} g_2(\sigma^2, \eta) \leq \min_{\sigma^2, \eta, \mathbf{1}} \text{NLL}(\sigma^2, \eta, \mathbf{1}). \quad (3)$$

Next, we will show that, if  $\|\mathbf{y}\|_2^2 \rightarrow \infty$ , then

$$\min_{\sigma^2, \eta} g_1(\sigma^2, \eta) \rightarrow \infty.$$

First, note that  $g_1$  depends only on the sum  $\eta + \sigma^2$ , rather than the individual values. Therefore, we can re-parameterize  $g_1$  as follows

$$g_{1*}(z) := \lambda_1^{-1} z \|\mathbf{y}\|_2^2 + n \log(\lambda_0) - n \log z,$$

where  $z := (\eta + \sigma^2)^{-1}$ , and we have

$$\min_z g_{1*}(z) = \min_{\sigma^2, \eta} g_1(\sigma^2, \eta).$$

Since  $g_{1*}$  is a convex function, the minimum value of  $g_{1*}$  is attained for  $\hat{z}$  with

$$\frac{\partial g_{1*}}{\partial z}(\hat{z}) = \frac{\|\mathbf{y}\|_2^2}{\lambda_1} - \frac{n}{\hat{z}} = 0,$$

and therefore

$$\hat{z} = n \frac{\lambda_1}{\|\mathbf{y}\|_2^2},$$

and

$$\min_z g_{1*}(z) = n + n \log(\lambda_0) - n \log(\lambda_1 n) + n \log(\|\mathbf{y}\|_2^2).$$

Therefore, if  $\|\mathbf{y}\|_2^2 \rightarrow \infty$ ,

$$\min_z g_{1*}(z) \rightarrow \infty,$$

and as a consequence, from Inequalities (3), we have

$$\min_{\sigma^2, \eta, \mathbf{1}} \text{NLL}(\sigma^2, \eta, \mathbf{1}) \rightarrow \infty.$$

Therefore, as long as one or more observations belonging to  $V$  are selected, we must have that  $\min_{\sigma^2, \eta, \mathbf{1}} \text{NLL}(\sigma^2, \eta, \mathbf{1}) \rightarrow \infty$ . Since  $\text{NLL}(\sigma^2, \eta, \mathbf{1})$  is bounded from above for observations belonging to  $U$ , the trimmed marginal likelihood GP will select only observations from  $U$ .

### A.3 ASYMPTOTIC BIAS CORRECTION FOR $\sigma^2$

Here, we explain the asymptotic correction for estimating the noise variance for Algorithm 2 in the main paper.

The derivation presented here, generalizes the derivation for the correction of the median linear regression Rousseeuw [1984]. Let  $Q_f$  denote the quantile function for distribution  $f$ , and by  $Q_{\{r_i^2\}_{i=1}^n}$  the empirical quantile function of observed squared residuals  $r_i^2$ . We define  $Q_{\{r_i^2\}_{i=1}^n}(p) = r_{(\lfloor pn \rfloor)}^2$ , where  $r_{(1)}^2 \leq r_{(2)}^2 \leq \dots \leq r_{(n)}^2$ . Let  $\nu$  be the user-set maximum outlier-ratio, i.e.  $1 - \nu = \frac{m}{n}$ . Furthermore, note that each  $r_i^2$  is distributed according to  $\sigma^2 \chi^2(1)$ , where  $\chi^2(1)$  is the  $\chi^2$  distribution with 1 degree of freedom. For  $n \rightarrow \infty$ , we have, see e.g. [Walker, 1968],

$$Q_{\{r_i^2\}_{i=1}^n}(1 - \nu) \xrightarrow{p} Q_{\sigma^2 \chi^2(1)}(1 - \nu).$$

Therefore, for sufficiently large  $n$ , we have that

$$\begin{aligned} Q_{\{r_i^2\}_{i=1}^n}(1-\nu) &\approx Q_{\sigma^2\chi^2(1)}(1-\nu) \\ &= \sigma^2 Q_{\chi^2(1)}(1-\nu). \end{aligned}$$

The last line follows from properties of the quantile function (see for example Lemma 1 in this supplement material). Therefore, we set

$$\sigma^2 = \frac{r_{\lceil(1-\nu)n\rceil}^2}{Q_{\chi^2(1)}(1-\nu)}.$$

**Lemma 1.** *Let  $Q_X$  be the quantile function of a real valued random variable  $X$ , and define  $Y := \alpha X$ , where  $\alpha > 0$ . Then the following holds*

$$Q_Y = \alpha Q_X.$$

*Proof.* First note that

$$\begin{aligned} P(Y \leq y) &= P(X\alpha \leq y) \\ &= P(X \leq \frac{y}{\alpha}). \end{aligned}$$

For any  $u \in ]0, 1[$ , we have

$$\begin{aligned} Q_Y(u) &= \inf\{y \in \mathbb{R} \mid u \leq P(Y \leq y)\} \\ &= \inf\{y \in \mathbb{R} \mid u \leq P(X \leq \frac{y}{\alpha})\} \\ &= \alpha \inf\{\frac{y}{\alpha} \in \mathbb{R} \mid u \leq P(X \leq \frac{y}{\alpha})\} \\ &= \alpha \inf\{x \in \mathbb{R} \mid u \leq P(X \leq x)\} \\ &= \alpha Q_X(u). \end{aligned}$$

□

## B DETAILS OF GREEDY METHOD

The function starts with the index set of all data points  $S := \{1, 2, \dots, n\}$ , and then removes the data point  $i_*$  which leads to the largest marginal likelihood, i.e.

$$i_* := \arg \max_{i \in S} \left( \log p(\mathbf{y}_{S \setminus \{i\}} | X_{S \setminus \{i\}}, \boldsymbol{\theta}) \right). \quad (4)$$

This is repeated until  $|S| = \lceil(1-\nu)n\rceil$ . Naively solving the optimization in Equation (4) is in  $O(n^4)$ , since we need to repeat  $n$ -times the calculation of the determinant and inverse of  $K_{S \setminus \{i\}}$ , where  $K_{S \setminus \{i\}}$  denotes the covariance matrix (plus  $\sigma^2 I$ ) of the data points in  $S \setminus \{i\}$ . However, using the block matrix inversion lemma (together with the Woodbury formula) and the cofactor representation of the determinant, we can solve it in  $O(n^3)$  as follows. Without loss of generality assume that sample  $i$  corresponds to the last row and column of  $K_S$  and write

$$K_S =: \begin{pmatrix} A & \mathbf{b} \\ \mathbf{b}^T & c \end{pmatrix}, \text{ and } K_S^{-1} =: \begin{pmatrix} U & \mathbf{v} \\ \mathbf{v}^T & w \end{pmatrix}.$$

Using the block matrix inversion lemma, we have

$$\begin{aligned} U &= A^{-1} + A^{-1}\mathbf{b}(-\mathbf{v}^T) \\ &= A^{-1}(I - \mathbf{b}\mathbf{v}^T), \end{aligned}$$

and therefore

$$\begin{aligned} A^{-1} &= U(I - \mathbf{b}\mathbf{v}^T)^{-1} \\ &= U\left(I + \mathbf{b}\mathbf{v}^T \frac{1}{1 - \mathbf{v}^T \mathbf{b}}\right), \end{aligned}$$

where in the last line we used the Woodbury formula. Since  $A = K_{S \setminus \{i\}}$ , this allows for an efficient calculation of  $K_{S \setminus \{i\}}^{-1}$ . Finally, the determinant  $|K_{S \setminus \{i\}}|$  can also be efficiently calculated as follows. Denote the cofactor matrix of  $K_S$  as  $C$ , therefore we have  $C_{nn} = |A|$ . Using the cofactor representation of the inverse, we have

$$K_S^{-1} = \frac{1}{|K_S|} C,$$

and therefore

$$\begin{aligned} |A| &= C_{nn} \\ &= |K_S| (K_S^{-1})_{nn}. \end{aligned}$$

## C COMMENT ON BIAS MODEL FROM PREVIOUS WORKS

The method in [Park et al., 2021] ("Constant Bias Model", Section 3.1) introduces a bias vector  $\boldsymbol{\delta} \in \mathbb{R}^n$ , where  $n$  is the number of samples. If  $\delta_i \neq 0$ , then sample  $i$  is considered an outlier. Furthermore, introducing a Laplace prior on each  $\delta_i$ , with common scale  $\lambda$ , they propose to jointly estimate  $\boldsymbol{\delta}$  and  $\lambda$  as follows:

$$\hat{\boldsymbol{\delta}}, \hat{\lambda} = \arg \min_{\boldsymbol{\delta}, \lambda} \frac{1}{2} (\mathbf{y} - \boldsymbol{\delta})^T A^{-1} (\mathbf{y} - \boldsymbol{\delta}) + \lambda \|\boldsymbol{\delta}\|_1 - \log \lambda,$$

for some positive definite matrix  $A$ , and responses  $\mathbf{y} \in \mathbb{R}^n$ .<sup>2</sup> They suggest to alternate between the optimization of  $\boldsymbol{\delta}$  and  $\lambda$ . However, even only one outlier can lead to a  $\hat{\boldsymbol{\delta}}$  which has no zero entry, that is all samples are treated as outliers. To see this, first consider the optimization of  $\boldsymbol{\delta}$ , leaving  $\lambda$  fixed. Assume that sample  $i_*$  is an outlier with  $y_{i_*} \rightarrow \infty$ , then we have  $|\delta_{i_*}| \rightarrow \infty$ . (On the other hand, if  $|\delta_{i_*}|$  were bounded, then  $y_{i_*}$  would have an arbitrarily large influence on the marginal likelihood.) Next, consider the optimization of  $\lambda$ , leaving  $\boldsymbol{\delta}$  fixed: the problem is convex with the unique minimum at

$$\hat{\lambda} = \frac{1}{\|\boldsymbol{\delta}\|_1}.$$

Note that  $\frac{1}{\|\boldsymbol{\delta}\|_1} < \frac{1}{|\delta_{i_*}|}$ . Since  $|\delta_{i_*}| \rightarrow \infty$ , we have that  $\hat{\lambda} \rightarrow 0$ . However, if  $\hat{\lambda}$  is close to 0, the penalty  $\lambda \|\boldsymbol{\delta}\|_1$  will in effect be switched off, leading to  $\hat{\boldsymbol{\delta}} = \mathbf{y}$ .

## D ADDITIONAL DETAILS AND EXPERIMENTS

For all methods, we initialize all hyper-parameters  $\boldsymbol{\theta}$  to  $\log 2$ , except the variance  $\sigma^2$  which is initialized to 10. For all data, we standardize the response and covariates using the median and the interquartile range (IQR). For all experiments, we used an Nvidia DGX-2. For the real datasets, for evaluating the predictive performance of all methods, we randomly split the data into training (90%) and test data (10%).

### D.1 ADDITIONAL RESULTS

#### References

Hédy Attouch, Jérôme Bolte, Patrick Redont, and Antoine Soubeyran. Proximal alternating minimization and projection methods for nonconvex problems: An approach based on the kurdyka-łojasiewicz inequality. *Mathematics of operations research*, 35(2):438–457, 2010.

<sup>2</sup>The term  $\lambda \|\boldsymbol{\delta}\|_1 - \log \lambda$  is supposed to correspond to a Laplace prior on each component of  $\delta_i$ . However, note that the resulting penalty on  $\lambda$ , should be  $-n \log \lambda$  rather than  $-\log \lambda$ .

Table 1: Estimated upper bound on outlier ratio  $\nu$ . Except "no extra outliers", the true ratio of added outliers is 0.1.

|         | no extra outliers | uniform     | focused     | asym        |
|---------|-------------------|-------------|-------------|-------------|
| bow     | 0.02 (0.01)       | 0.08 (0.0)  | 0.09 (0.02) | 0.07 (0.0)  |
| F100    | 0.03 (0.01)       | 0.07 (0.01) | 0.08 (0.03) | 0.08 (0.01) |
| F400    | 0.02 (0.0)        | 0.07 (0.0)  | 0.1 (0.0)   | 0.07 (0.0)  |
| body    | 0.02 (0.0)        | 0.06 (0.01) | 0.06 (0.02) | 0.07 (0.01) |
| house   | 0.02 (0.0)        | 0.06 (0.0)  | 0.06 (0.02) | 0.06 (0.0)  |
| spacega | 0.03 (0.0)        | 0.07 (0.0)  | 0.08 (0.0)  | 0.07 (0.0)  |

Table 2: Runtime in minutes of each GP regression method.

| no extra added outliers |                    |                    |                    |               |
|-------------------------|--------------------|--------------------|--------------------|---------------|
|                         | GP                 | $\gamma$ -GP       | $t$ -GP            | $\nu$ -GP     |
| bow                     | <b>0.06</b> (0.0)  | 0.1 (0.0)          | 0.1 (0.0)          | 5.93 (0.76)   |
| F100                    | <b>0.09</b> (0.01) | 0.13 (0.0)         | 0.17 (0.0)         | 4.33 (3.42)   |
| F400                    | <b>0.1</b> (0.01)  | 0.25 (0.02)        | 0.31 (0.03)        | 2.88 (0.6)    |
| body                    | <b>0.1</b> (0.0)   | 0.27 (0.0)         | 0.23 (0.0)         | 67.3 (0.0)    |
| house                   | <b>0.12</b> (0.0)  | 0.25 (0.0)         | 0.36 (0.0)         | 17.85 (0.0)   |
| spacega                 | <b>1.02</b> (0.0)  | 8.88 (0.0)         | 8.79 (0.0)         | 9.05 (0.0)    |
| uniform outliers        |                    |                    |                    |               |
| bow                     | <b>0.06</b> (0.0)  | 0.1 (0.0)          | 0.1 (0.0)          | 3.44 (0.44)   |
| F100                    | <b>0.09</b> (0.0)  | 0.13 (0.01)        | 0.17 (0.0)         | 2.53 (1.32)   |
| F400                    | <b>0.11</b> (0.01) | 0.24 (0.01)        | 0.15 (0.01)        | 3.04 (1.23)   |
| body                    | 0.77 (0.48)        | 0.25 (0.01)        | <b>0.22</b> (0.0)  | 29.44 (15.93) |
| house                   | 0.41 (0.38)        | <b>0.24</b> (0.02) | <b>0.24</b> (0.03) | 25.76 (29.33) |
| spacega                 | <b>0.76</b> (0.02) | 8.8 (0.06)         | 8.78 (0.07)        | 9.07 (0.17)   |
| focused outliers        |                    |                    |                    |               |
| bow                     | <b>0.06</b> (0.0)  | 0.1 (0.0)          | 0.1 (0.0)          | 3.51 (0.53)   |
| F100                    | <b>0.09</b> (0.01) | 0.13 (0.0)         | 0.17 (0.01)        | 3.24 (2.37)   |
| F400                    | <b>0.1</b> (0.0)   | 0.23 (0.0)         | 0.12 (0.02)        | 4.71 (1.13)   |
| body                    | <b>0.1</b> (0.0)   | 0.24 (0.01)        | 0.22 (0.0)         | 55.5 (43.44)  |
| house                   | <b>0.11</b> (0.0)  | 0.23 (0.01)        | 0.28 (0.01)        | 20.09 (4.42)  |
| spacega                 | <b>0.84</b> (0.01) | 8.74 (0.11)        | 8.67 (0.09)        | 23.81 (3.73)  |
| asymmetric outliers     |                    |                    |                    |               |
| bow                     | <b>0.06</b> (0.0)  | 0.1 (0.0)          | 0.1 (0.01)         | 3.33 (0.36)   |
| F100                    | <b>0.09</b> (0.0)  | 0.13 (0.01)        | 0.17 (0.0)         | 3.66 (3.32)   |
| F400                    | <b>0.12</b> (0.02) | 0.23 (0.01)        | 0.15 (0.02)        | 2.68 (0.46)   |
| body                    | 0.46 (0.42)        | 0.24 (0.03)        | <b>0.22</b> (0.0)  | 26.23 (14.72) |
| house                   | 0.3 (0.38)         | 0.24 (0.01)        | <b>0.23</b> (0.01) | 9.58 (4.56)   |
| spacega                 | <b>0.76</b> (0.02) | 8.8 (0.06)         | 8.78 (0.08)        | 8.92 (0.23)   |

Table 3: Runtime in minutes of each optimization method.

| no extra added outliers |                    |                       |                        |
|-------------------------|--------------------|-----------------------|------------------------|
|                         | <b>PGD</b>         | <b>Greedy (batch)</b> | <b>Greedy (1-by-1)</b> |
| bow                     | <b>0.2</b> (0.02)  | 10.37 (7.07)          | 169.51 (32.26)         |
| F100                    | <b>0.14</b> (0.12) | 8.86 (7.98)           | 5.01 (3.68)            |
| F400                    | <b>0.12</b> (0.05) | 10.89 (9.67)          | 173.58 (52.01)         |
| body                    | <b>1.49</b> (0.0)  | 3.4 (0.0)             | 27.17 (0.0)            |
| house                   | <b>0.27</b> (0.0)  | 7.29 (0.0)            | 76.35 (0.0)            |
| spacega                 | <b>0.82</b> (0.0)  | 23.8 (0.0)            | -                      |
| uniform outliers        |                    |                       |                        |
| bow                     | <b>0.14</b> (0.04) | 2.37 (0.29)           | 160.39 (3.15)          |
| F100                    | <b>0.13</b> (0.15) | 1.74 (1.85)           | 7.76 (5.66)            |
| F400                    | <b>0.15</b> (0.06) | 2.59 (1.44)           | 42.53 (4.65)           |
| body                    | <b>0.79</b> (0.75) | 5.17 (3.97)           | 65.61 (59.16)          |
| house                   | <b>0.21</b> (0.26) | 2.82 (2.64)           | 150.36 (107.69)        |
| spacega                 | <b>0.6</b> (0.15)  | 8.52 (0.11)           | -                      |
| focused outliers        |                    |                       |                        |
| bow                     | <b>0.17</b> (0.01) | 3.49 (0.78)           | 170.7 (26.81)          |
| F100                    | <b>0.14</b> (0.18) | 1.37 (1.06)           | 8.13 (4.43)            |
| F400                    | <b>0.13</b> (0.0)  | 2.94 (0.62)           | 139.74 (19.06)         |
| body                    | <b>0.21</b> (0.24) | 2.03 (0.82)           | 33.37 (37.42)          |
| house                   | <b>0.71</b> (1.19) | 6.12 (7.69)           | 227.69 (209.95)        |
| spacega                 | <b>0.9</b> (0.07)  | 9.09 (1.44)           | -                      |
| asymmetric outliers     |                    |                       |                        |
| bow                     | <b>0.09</b> (0.0)  | 2.2 (0.07)            | 48.24 (1.08)           |
| F100                    | <b>0.13</b> (0.15) | 2.61 (3.26)           | 5.23 (3.56)            |
| F400                    | <b>0.13</b> (0.0)  | 2.13 (1.34)           | 42.8 (5.34)            |
| body                    | <b>0.41</b> (0.48) | 3.18 (4.07)           | 42.09 (37.34)          |
| house                   | <b>0.15</b> (0.1)  | 1.3 (1.0)             | 73.9 (69.2)            |
| spacega                 | <b>0.54</b> (0.01) | 8.47 (0.35)           | -                      |

Table 4: Marginal likelihood of solution found by different optimization methods.

| no extra added outliers |                     |                       |                        |
|-------------------------|---------------------|-----------------------|------------------------|
|                         | <b>PGD</b>          | <b>Greedy (batch)</b> | <b>Greedy (1-by-1)</b> |
| bow                     | <b>1.76</b> (0.09)  | 1.75 (0.09)           | <b>1.76</b> (0.08)     |
| F100                    | <b>0.07</b> (0.12)  | -0.06 (0.24)          | -0.0 (0.46)            |
| F400                    | 0.34 (0.2)          | 0.36 (0.23)           | <b>0.42</b> (0.24)     |
| body                    | <b>3.35</b> (0.0)   | 3.11 (0.0)            | 3.23 (0.0)             |
| house                   | 0.11 (0.0)          | 0.09 (0.0)            | <b>0.18</b> (0.0)      |
| spacega                 | -0.31 (0.0)         | <b>0.38</b> (0.0)     | -                      |
| uniform outliers        |                     |                       |                        |
| bow                     | <b>1.7</b> (0.07)   | 1.54 (0.08)           | <b>1.7</b> (0.07)      |
| F100                    | 0.01 (0.18)         | -0.1 (0.14)           | <b>0.1</b> (0.17)      |
| F400                    | 0.19 (0.12)         | 0.07 (0.19)           | <b>0.2</b> (0.12)      |
| body                    | <b>-1.34</b> (2.33) | -1.5 (2.02)           | <b>-1.34</b> (2.3)     |
| house                   | -1.99 (1.13)        | -2.0 (1.11)           | <b>-1.96</b> (1.16)    |
| spacega                 | -0.26 (0.03)        | <b>0.05</b> (0.07)    | -                      |
| focused outliers        |                     |                       |                        |
| bow                     | <b>1.8</b> (0.05)   | 1.57 (0.05)           | <b>1.8</b> (0.05)      |
| F100                    | 0.13 (0.13)         | -0.08 (0.25)          | <b>0.22</b> (0.13)     |
| F400                    | 0.15 (0.04)         | -0.0 (0.05)           | <b>0.22</b> (0.16)     |
| body                    | 0.72 (1.19)         | 0.46 (0.91)           | <b>0.74</b> (1.25)     |
| house                   | 0.27 (0.18)         | 0.15 (0.26)           | <b>0.32</b> (0.25)     |
| spacega                 | -0.26 (0.01)        | <b>-0.02</b> (0.14)   | -                      |
| asymmetric outliers     |                     |                       |                        |
| bow                     | <b>1.67</b> (0.1)   | 1.49 (0.11)           | <b>1.67</b> (0.1)      |
| F100                    | <b>0.15</b> (0.13)  | -0.13 (0.21)          | 0.14 (0.32)            |
| F400                    | 0.17 (0.07)         | 0.03 (0.14)           | <b>0.23</b> (0.13)     |
| body                    | -1.17 (2.25)        | -1.56 (1.5)           | <b>-1.14</b> (2.27)    |
| house                   | <b>-1.23</b> (0.96) | -1.29 (0.92)          | <b>-1.23</b> (0.96)    |
| spacega                 | -0.25 (0.02)        | <b>-0.07</b> (0.09)   | -                      |



Table 5: Outlier ranking performance (R-precision) of different optimization methods.

| uniform outliers    |                    |                    |                    |
|---------------------|--------------------|--------------------|--------------------|
|                     | PGD                | Greedy (batch)     | Greedy (1-by-1)    |
| bow                 | <b>1.0</b> (0.0)   | <b>1.0</b> (0.0)   | <b>1.0</b> (0.0)   |
| F100                | <b>1.0</b> (0.0)   | <b>1.0</b> (0.0)   | <b>1.0</b> (0.0)   |
| F400                | <b>1.0</b> (0.0)   | <b>1.0</b> (0.0)   | <b>1.0</b> (0.0)   |
| body                | <b>0.87</b> (0.06) | 0.86 (0.06)        | 0.86 (0.06)        |
| house               | <b>0.86</b> (0.06) | 0.85 (0.06)        | <b>0.86</b> (0.05) |
| spacega             | 0.98 (0.0)         | <b>0.99</b> (0.01) | -                  |
| focused outliers    |                    |                    |                    |
| bow                 | <b>1.0</b> (0.0)   | <b>1.0</b> (0.0)   | <b>1.0</b> (0.0)   |
| F100                | <b>1.0</b> (0.0)   | <b>1.0</b> (0.0)   | <b>1.0</b> (0.0)   |
| F400                | <b>1.0</b> (0.0)   | <b>1.0</b> (0.0)   | <b>1.0</b> (0.0)   |
| body                | <b>1.0</b> (0.01)  | 0.95 (0.11)        | 0.98 (0.05)        |
| house               | <b>0.91</b> (0.16) | 0.55 (0.24)        | 0.71 (0.32)        |
| spacega             | <b>0.97</b> (0.0)  | 0.31 (0.3)         | -                  |
| asymmetric outliers |                    |                    |                    |
| bow                 | <b>1.0</b> (0.0)   | <b>1.0</b> (0.0)   | <b>1.0</b> (0.0)   |
| F100                | <b>1.0</b> (0.0)   | 0.99 (0.03)        | <b>1.0</b> (0.0)   |
| F400                | <b>1.0</b> (0.0)   | <b>1.0</b> (0.0)   | <b>1.0</b> (0.0)   |
| body                | <b>0.86</b> (0.06) | <b>0.86</b> (0.06) | <b>0.86</b> (0.06) |
| house               | <b>0.85</b> (0.05) | <b>0.85</b> (0.05) | <b>0.85</b> (0.05) |
| spacega             | 0.98 (0.0)         | <b>0.99</b> (0.0)  | -                  |

Hedy Attouch, Jérôme Bolte, and Benar Fux Svaiter. Convergence of descent methods for semi-algebraic and tame problems: proximal algorithms, forward–backward splitting, and regularized gauss–seidel methods. *Mathematical Programming*, 137(1):91–129, 2013.

Jérôme Bolte, Shoham Sabach, and Marc Teboulle. Proximal alternating linearized minimization for nonconvex and nonsmooth problems. *Mathematical Programming*, 146(1):459–494, 2014.

Guoyin Li and Ting Kei Pong. Calculus of the exponent of kurdyka–lojasiewicz inequality and its applications to linear convergence of first-order methods. *Foundations of computational mathematics*, 18(5):1199–1232, 2018.

Chiwoo Park, David J Borth, Nicholas S Wilson, Chad N Hunter, and Fritz J Friedersdorf. Robust gaussian process regression with a bias model. *Pattern Recognition*, page 108444, 2021.

Peter J Rousseeuw. Least median of squares regression. *Journal of the American Statistical Association*, 79(388):871–880, 1984.

AM Walker. A note on the asymptotic distribution of sample quantiles. *Journal of the Royal Statistical Society: Series B (Methodological)*, 30(3):570–575, 1968.

Table 6: Root mean squared error (RMSE) on test data of different optimization methods.

| no extra added outliers |                    |                       |                        |
|-------------------------|--------------------|-----------------------|------------------------|
|                         | <b>PGD</b>         | <b>Greedy (batch)</b> | <b>Greedy (1-by-1)</b> |
| bow                     | <b>0.06</b> (0.0)  | <b>0.06</b> (0.0)     | <b>0.06</b> (0.0)      |
| F100                    | <b>0.32</b> (0.05) | 0.34 (0.08)           | 0.42 (0.19)            |
| F400                    | 0.25 (0.05)        | <b>0.23</b> (0.06)    | 0.24 (0.05)            |
| body                    | 0.08 (0.1)         | <b>0.05</b> (0.08)    | 0.08 (0.09)            |
| house                   | 0.55 (0.12)        | <b>0.46</b> (0.11)    | 0.54 (0.13)            |
| spacega                 | 0.49 (0.03)        | <b>0.37</b> (0.02)    | -                      |
| uniform outliers        |                    |                       |                        |
| bow                     | <b>0.05</b> (0.0)  | 0.06 (0.0)            | <b>0.05</b> (0.0)      |
| F100                    | 0.31 (0.06)        | 0.31 (0.07)           | <b>0.29</b> (0.07)     |
| F400                    | 0.25 (0.03)        | <b>0.23</b> (0.05)    | 0.24 (0.03)            |
| body                    | <b>0.05</b> (0.08) | <b>0.05</b> (0.07)    | <b>0.05</b> (0.07)     |
| house                   | 0.4 (0.14)         | <b>0.37</b> (0.12)    | 0.4 (0.13)             |
| spacega                 | 0.4 (0.02)         | <b>0.36</b> (0.01)    | -                      |
| focused outliers        |                    |                       |                        |
| bow                     | <b>0.05</b> (0.0)  | <b>0.05</b> (0.0)     | <b>0.05</b> (0.0)      |
| F100                    | 0.26 (0.06)        | 0.3 (0.14)            | <b>0.25</b> (0.05)     |
| F400                    | 0.25 (0.01)        | 0.25 (0.01)           | <b>0.24</b> (0.03)     |
| body                    | <b>0.07</b> (0.08) | 0.1 (0.09)            | 0.08 (0.08)            |
| house                   | 0.4 (0.07)         | <b>0.34</b> (0.06)    | 0.39 (0.09)            |
| spacega                 | <b>0.41</b> (0.06) | 0.43 (0.04)           | -                      |
| asymmetric outliers     |                    |                       |                        |
| bow                     | <b>0.06</b> (0.0)  | <b>0.06</b> (0.0)     | <b>0.06</b> (0.0)      |
| F100                    | <b>0.26</b> (0.05) | 0.33 (0.09)           | 0.3 (0.12)             |
| F400                    | 0.25 (0.02)        | <b>0.24</b> (0.04)    | <b>0.24</b> (0.03)     |
| body                    | <b>0.12</b> (0.11) | 0.15 (0.11)           | <b>0.12</b> (0.12)     |
| house                   | 0.35 (0.13)        | <b>0.33</b> (0.09)    | 0.34 (0.12)            |
| spacega                 | 0.4 (0.02)         | <b>0.37</b> (0.02)    | -                      |
